# Supplementary material for: Deletion of Diterpenoid Biosynthetic Genes CYP76M7 and CYP76M8 Induces Cell Death and Enhances Bacterial Blight Resistance in Indica Rice ‘9311’
Source: MDPI journal article supplement (doi:10.3390/ijms23137234), 2022-06-29
Supplement: s1 [file s1]

## Supplementary materials

**Supplementary Figure S1.** ROS accumulation in *g380* before the lesions formation. (a) DAB staining of *9311* and *g380* leaves. (b-f) The ROS related physiological-biochemical indexes of *9311* and *g380* leaves. Bar=1 cm in (a). Values are mean  $\pm$  SD ( $n = 3$ ). \*\* indicates significant differences at  $p < 0.01$  level by Welch's *t*-test, \* indicates significant differences at  $p < 0.05$  level by Welch's *t*-test, *ns* indicates  $p > 0.05$  level by Welch's *t*-test.

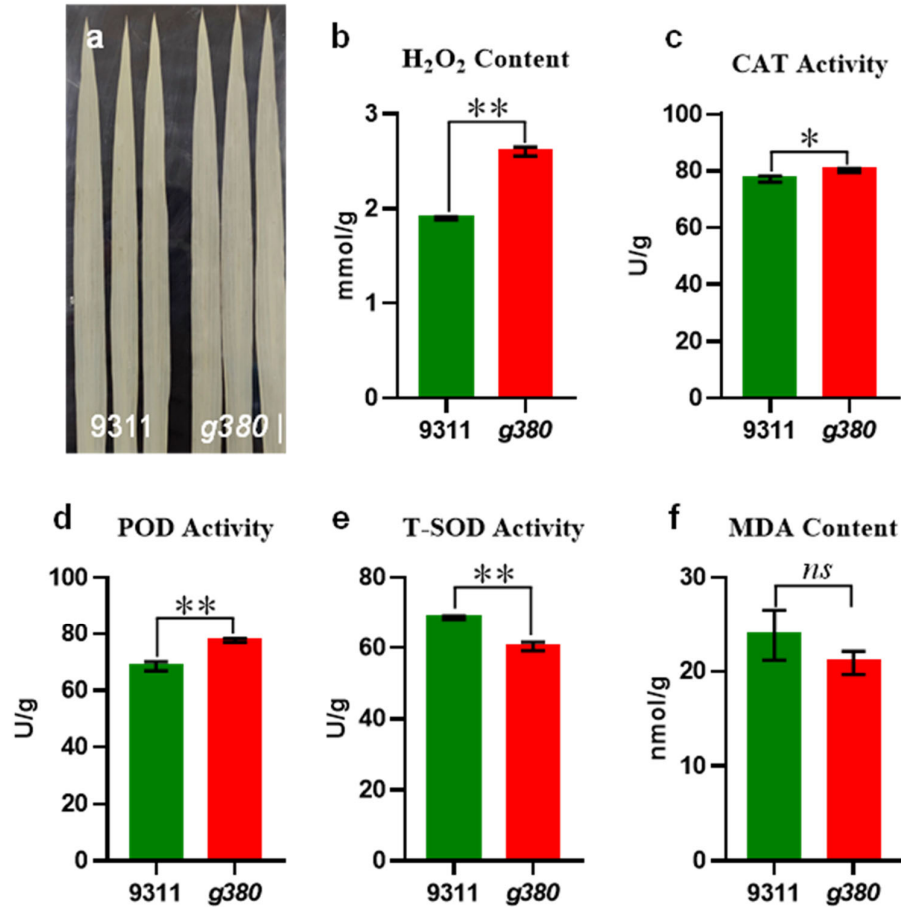

**Supplementary Figure S2.** Upregulated genes enriched the phenylpropanoid biosynthesis (dosa00940) pathway.

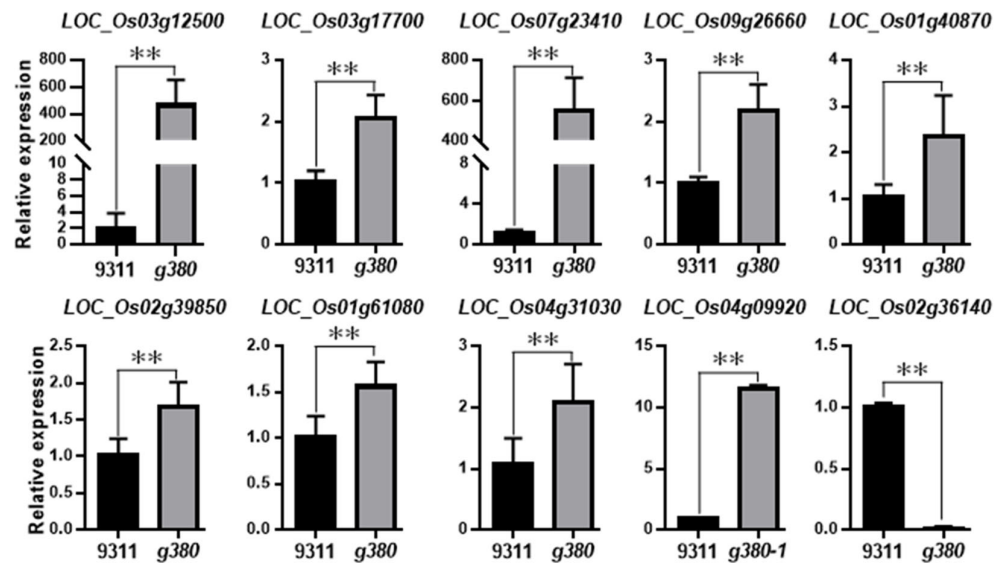

Supplementary Figure S3. Lignin content of 9311 and *g380* before *g380* lesion formed.

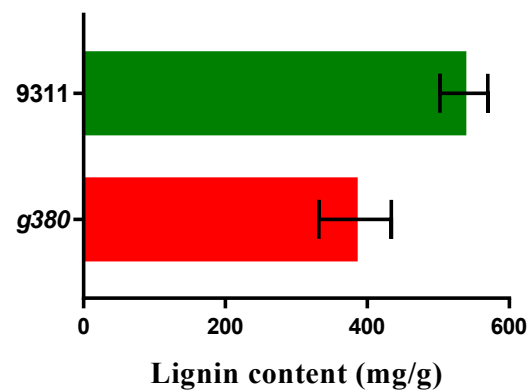

**Supplementary Table S1.** Summary of RNA-seq data production.

| Sample | Raw reads   | Raw bases      | Clean reads | Clean bases    | Clean data rate | Reads mapped to genome | Mapping rate |
|--------|-------------|----------------|-------------|----------------|-----------------|------------------------|--------------|
| g380_1 | 109,394,138 | 10,939,413,800 | 102,335,692 | 10,012,335,791 | 91.53%          | 79,424,324             | 77.61%       |
| g380_2 | 99,866,956  | 9,986,695,600  | 93,789,966  | 9,195,128,262  | 92.07%          | 72,140,490             | 76.92%       |
| g380_3 | 103,030,918 | 10,303,091,800 | 97,158,506  | 9,535,482,959  | 92.55%          | 73,454,724             | 75.60%       |
| 9311_1 | 112,525,000 | 11,252,500,000 | 103,597,194 | 10,141,888,103 | 90.13%          | 81,316,532             | 78.49%       |
| 9311_2 | 102,858,738 | 10,285,873,800 | 97,198,894  | 9,547,028,366  | 92.82%          | 70,210,316             | 72.23%       |
| 9311_3 | 116,315,728 | 11,631,572,800 | 109,122,984 | 10,710,401,300 | 92.08%          | 83,746,156             | 76.74%       |

**Supplementary Table S2.** Differentially expressed *PR* genes.

| <i>gene_symbol</i> | MSU_ID         | log <sub>2</sub> FC | <i>P</i> Value | FDR      |
|--------------------|----------------|---------------------|----------------|----------|
| <i>OsPR1b</i>      | LOC_Os01g28450 | 6.09                | 2.76E-09       | 9.66E-07 |
| <i>OsPR1a</i>      | LOC_Os07g03710 | 8.18                | 3.72E-12       | 2.45E-09 |
| <i>PR5</i>         | LOC_Os12g43430 | 5.14                | 5.03E-14       | 4.34E-11 |
| <i>PR1c</i>        | LOC_Os01g28500 | 2.89                | 3.91E-06       | 7.30E-04 |
| <i>PR1</i>         | LOC_Os07g03730 | 5.43                | 8.42E-09       | 2.72E-06 |
| <i>Gns5</i>        | LOC_Os01g71340 | 5.07                | 7.58E-09       | 2.51E-06 |
| <i>Gns6</i>        | LOC_Os01g71350 | 4.28                | 8.73E-14       | 7.41E-11 |
| <i>OsCHIT8</i>     | LOC_Os06g51060 | 3.52                | 3.88E-05       | 5.36E-03 |
| <i>OsCHIT14</i>    | LOC_Os10g39680 | 3.54                | 5.00E-05       | 6.62E-03 |
| <i>OsCHIT17</i>    | LOC_Os05g33130 | 6.94                | 9.61E-14       | 8.03E-11 |
| <i>OsPR4a</i>      | LOC_Os11g37970 | 3.94                | 1.62E-09       | 5.94E-07 |
| <i>OsPR4c</i>      | LOC_Os11g37950 | 7.41                | 2.74E-14       | 2.48E-11 |
| <i>TLP</i>         | LOC_Os03g46070 | 4.27                | 4.86E-17       | 6.80E-14 |
| <i>BBTI-7</i>      | LOC_Os01g03390 | 5.42                | 1.40E-09       | 5.21E-07 |
| <i>BBTI-12</i>     | LOC_Os01g04050 | 2.56                | 3.51E-05       | 4.92E-03 |
| <i>Oschib1</i>     | LOC_Os10g28080 | 5.09                | 5.20E-18       | 9.40E-15 |
| <i>OsPR10</i>      | LOC_Os12g36880 | 5.54                | 1.01E-15       | 1.16E-12 |
| <i>PR10B</i>       | LOC_Os12g36850 | 5.51                | 2.47E-15       | 2.61E-12 |
| <i>RSOsPR10</i>    | LOC_Os12g36830 | 5.44                | 2.07E-10       | 9.20E-08 |
| <i>OsGLP8-7</i>    | LOC_Os08g09010 | 3.39                | 4.50E-04       | 4.34E-02 |

**Supplementary Table S3.** Differentially expressed *WRKY* genes.

| <i>gene_symbol</i> | MSU_ID         | log <sub>2</sub> FC | <i>P</i> Value | FDR      |
|--------------------|----------------|---------------------|----------------|----------|
| <i>OsWRKY14</i>    | LOC_Os01g53040 | 3.04                | 1.38E-04       | 1.64E-02 |
| <i>OsWRKY24</i>    | LOC_Os01g61080 | 2.44                | 1.20E-04       | 1.44E-02 |
| <i>OsWRKY32</i>    | LOC_Os02g53100 | 4.79                | 3.06E-05       | 4.42E-03 |
| <i>OsWRKY19</i>    | LOC_Os05g49620 | 4.59                | 8.63E-16       | 1.03E-12 |
| <i>OsWRKY28</i>    | LOC_Os06g44010 | 3.71                | 7.77E-11       | 3.99E-08 |
| <i>OsWRKY69</i>    | LOC_Os08g29660 | 2.70                | 3.96E-05       | 5.44E-03 |
| <i>OsWRKY72</i>    | LOC_Os11g29870 | 3.21                | 1.15E-07       | 2.97E-05 |

**Supplementary Table S4.** Upregulated genes enriched the phenylpropanoid biosynthesis (dosa00940) pathway.

| <i>gene_symbol</i> | <i>MSU_ID</i>  | <i>log<sub>2</sub>FC</i> | <i>P Value</i> | <i>FDR</i> |
|--------------------|----------------|--------------------------|----------------|------------|
| <i>prx15</i>       | LOC_Os01g22352 | 4.47                     | 6.40E-12       | 3.89E-09   |
| <i>prx16</i>       | LOC_Os01g22370 | 1.65                     | 2.60E-04       | 2.74E-02   |
| <i>OsALDH2C1</i>   | LOC_Os01g40870 | 2.37                     | 3.77E-11       | 2.03E-08   |
| <i>prx22</i>       | LOC_Os01g73200 | 2.09                     | 4.88E-05       | 6.49E-03   |
| <i>Os4CL3</i>      | LOC_Os02g08100 | 1.81                     | 3.38E-05       | 4.79E-03   |
| <i>OsCAD2</i>      | LOC_Os02g09490 | 3.21                     | 2.07E-08       | 6.36E-06   |
| <i>OsHCT2</i>      | LOC_Os02g39850 | 2.12                     | 6.60E-09       | 2.20E-06   |
| <i>OsPAL1</i>      | LOC_Os02g41630 | 3.44                     | 3.40E-09       | 1.18E-06   |
| <i>OsPAL2</i>      | LOC_Os02g41650 | 2.43                     | 8.77E-06       | 1.52E-03   |
| <i>OsPAL4</i>      | LOC_Os02g41680 | 3.47                     | 5.76E-12       | 3.58E-09   |
| <i>OsBGLU1</i>     | LOC_Os03g53800 | 2.70                     | 1.38E-06       | 2.91E-04   |
| <i>OsHCT1</i>      | LOC_Os04g42250 | 1.77                     | 1.34E-06       | 2.85E-04   |
| <i>prx61</i>       | LOC_Os04g59190 | 4.63                     | 9.48E-07       | 2.07E-04   |
| <i>prx117</i>      | LOC_Os08g02110 | 4.55                     | 7.56E-17       | 1.01E-13   |
| <i>OsCOMT</i>      | LOC_Os08g06100 | 2.58                     | 9.99E-08       | 2.68E-05   |
| <i>OsCCR20</i>     | LOC_Os08g34280 | 2.65                     | 2.31E-07       | 5.61E-05   |
| <i>Os9BGlu31</i>   | LOC_Os09g33680 | 1.05                     | 3.37E-04       | 3.42E-02   |
| <i>OsF5H1</i>      | LOC_Os10g36848 | 4.20                     | 2.04E-17       | 3.31E-14   |

**Supplementary Table S5.** Upregulated genes enriched the plant-pathogen interaction (dosa04626) pathway.

| <i>gene_symbol</i> | <b>MSU_ID</b>  | <b>log<sub>2</sub>FC</b> | <b>P Value</b> | <b>FDR</b> |
|--------------------|----------------|--------------------------|----------------|------------|
| <i>OsPR1b</i>      | LOC_Os01g28450 | 6.09                     | 2.76E-09       | 9.66E-07   |
| <i>PRB1-2</i>      | LOC_Os01g28500 | 2.89                     | 3.91E-06       | 7.30E-04   |
| <i>OsWRKY24</i>    | LOC_Os01g61080 | 2.44                     | 1.20E-04       | 1.44E-02   |
| <i>KCS</i>         | LOC_Os02g11070 | 2.59                     | 3.63E-09       | 1.25E-06   |
| <i>OsCEBiP</i>     | LOC_Os03g04110 | 1.32                     | 3.49E-04       | 3.52E-02   |
| <i>OsMPK3</i>      | LOC_Os03g17700 | 2.51                     | 4.70E-07       | 1.09E-04   |
| <i>OsRIN4</i>      | LOC_Os04g31030 | 1.56                     | 2.16E-04       | 2.36E-02   |
| <i>OsCML21</i>     | LOC_Os05g24780 | 3.81                     | 5.52E-08       | 1.59E-05   |
| <i>OsPR1a</i>      | LOC_Os07g03710 | 8.18                     | 3.72E-12       | 2.45E-09   |
| <i>Osrbmh7</i>     | LOC_Os09g26660 | 2.71                     | 2.10E-04       | 2.32E-02   |
| <i>OsPR1-101</i>   | LOC_Os10g11500 | 4.34                     | 3.05E-04       | 3.15E-02   |
| <i>OsCML36</i>     | LOC_Os11g04560 | 3.10                     | 4.78E-07       | 1.10E-04   |



**Supplementary Table S6.** Sequences of primers for linkage analysis and chromosome walking.

| Primer ID | Forward (5'-3')           | Reverse (5'-3')              |
|-----------|---------------------------|------------------------------|
| RM341     | CAAGAAACCTCAATCCGAGC      | CTCCTCCCGATCCCAATC           |
| C2-9      | TTTTTATCTCGAGGTACGGTAGTAG | TGAGAATTAGTGTTTCATTTGTAGATTC |
| C2-10     | GGCTGGCTGTTGCTCATC        | AAAAATCCCAACCCTGCTG          |
| RM13611   | CTCTTGAACGGCTGCACGAAAGG   | CGCGAGAATGGTAGGTGGATCG       |
| RM3850    | AAGTTGAGAATGAGGGACAA      | TTCGGAAGTGAAAAGGTAAT         |
| L24       | CCTCCTCTGAAAATCCA         | GTACCACCTCGTCGTCGC           |
| L26       | GAGGTTTGTGATTGGTCG        | ATCGTTGCTTGAAGTTGA           |
| L39       | CTATTCCTATTCCACCAGC       | TCGTGCGATAACACTAAA           |
| L45       | GCAAGTTTAAAGTACGATC       | TACAGTTGTGAACACCCA           |
| L46       | AGCGACCGAATTGAAGAG        | TAAGCCGTGGCAAGGAAC           |
| L4        | GCGATTTGACCGTCCTTT        | GACTTCCCGACACCTGCT           |
| L6        | GCTTACTACCGTACCACAT       | AGGCTCCATTCTTCATA            |
| L7        | ACTGTACCCCTGATTTC         | GCTGCCTAAGTGATTATTTTC        |
| L9        | CTCGCTAAGTATGAGATTTG      | GGTCTTGATTACGGAGG            |
| L10       | TGGCTGTTTGCTTGATC         | GAAATGCTGTAAGCGAGA           |
| L12       | GAGCGTAGGAGCAAACAG        | TGAGATAGAACTCAGGGAG          |
| L14       | CAGTGACCGTTGTTGTT         | GGATTATTAGGTTGGCTTTT         |
| L15       | CCCTAGACACGTACAAAA        | CAAACCTATTCAAGCAGAT          |
| L16       | GCCACTGCCCAAATCCTC        | TTGCCCCTCGTTTTACCA           |
| L27       | TAAGTAATTGTGGCTTCCTT      | CCGTAGTTCTATAATATGGG         |
| L28       | TTTTCAAATAATGGTCT         | TAAGAAGGTAGTGACAGC           |
| L34       | TGTGCTTGCTGTGCCTCT        | GCCGATTTTGGGATTTGT           |
| L36       | TCTGGCTATGGTTGCT          | TATTTGTACCGTGGGT             |
| L37       | TTTTCATAGTCGTTGGC         | GCACTAGCATCTAGCGT            |
| L38       | ACGCTACTTTTCTTGCT         | GACCGTCCGTCTTATT             |
| L40       | ATTGCCAGGCTATGTTTC        | TGCGATATTGCATCTCAT           |
| F11       | TTCTAACCAGCACCAACAAT      | GTAGCCATGACACAACCATCT        |
| F12       | GCATACTGAGATGGTTGTG       | TGGTGGTAATGAATAGAG           |
| F13       | GTCTGGATGATGCAAGGGA       | CCAACACGATAATGGGGAA          |
| F4        | GAAGATTGATTGTGTTGA        | CTAGATGCTGTATGGTTGA          |
| F5        | ACCAATCAACCATAACAGCA      | GAGCATCATCAGCATCACC          |
| R8        | ATGAGGTGAAAAAAGGAAAATG    | TCTATAGGGTCCCAACCAAGGT       |
| R9        | TTGCGTCCTTCATTTTCCTATT    | GCCATTTTCCTTTTTCACCTC        |
| R10       | AGAATACAAAAGGTAGCAAC      | TCAATAGGAAAATGAAGGAC         |
| R11       | AGAAATACGGAGCCGACGGAAAT   | AGGGGAAGAAGGAAGGTAGGGAG      |
| R12       | GCGGTTCACTAATGATAGAAAAG   | CAATGGTAATAGAAACACGGATA      |

**Supplementary Table S7.** Sequences of qRT-PCR primers.

| Gene symbol/ID        | Forward (5'-3')          | Reverse (5'-3')         |
|-----------------------|--------------------------|-------------------------|
| <i>Actin</i>          | CAGGCCGTCCTCTCTGTGA      | AAGGATAGCATGGGGGAGAG    |
| <i>OsPR1a</i>         | GGCCAATCTCCCTACTGATTAA   | GCATAAACACGTAGCATAGCAT  |
| <i>OsPR1b</i>         | TACGCCAGCCAGAGGAGC       | GCCGAACCCCAGAAGAGG      |
| <i>OsPR10</i>         | GGTGTGGGAAGCACATACAA     | GTCTCCGTCGAGTGTGACTTG   |
| <i>OsCPS2</i>         | CATCTCCAAGTTTTGTTCGAG    | TTTTCGCAGTCATCACTTTACG  |
| <i>CYP76M6</i>        | GGAAAGACTACGAGTACATCCC   | AACTTCTCAGTCATGTCCATGT  |
| <i>OsCPS4</i>         | ATCTACCCTTTGGATGTGTACG   | TGTCATCGATATCCTTTACCGG  |
| <i>OsKSL4</i>         | TTTGAGGTCTTTAGCGACAGAT   | TATAGTTGGTCCCAATGCGAAT  |
| <i>CYP99A2</i>        | ATCATGGAGATAAACTCGGCAG   | CTCTTCTTTGACGACGACTTG   |
| <i>OsPAL1</i>         | GACCCTGTATTTTCTTCGTTTCG  | AGTAGCAATACTTTCACCCCAA  |
| <i>OsPAL4</i>         | GTGCTCTTTGAGGCTAACATTTC  | CTTCTTGGCATGCTTCATGTAG  |
| <i>OsF5H1</i>         | TTCAACATCGGCGACTTCATC    | ATGATCTTGTGCGATGAACCTGT |
| <i>OsROMT9</i>        | GAAGAACCACTCCGTCATCATC   | GAGGATCCACTTCATCAGGATG  |
| <i>OsCCR20</i>        | ATGGCGTACGTTAATTAGTTGC   | TTTCCTTGCAGTAGTCAAGGTC  |
| <i>OsCAD2</i>         | GTACTGCAACAAGAGGATTTGG   | GATCTTCACCACAAACTTCTGG  |
| <i>LOC_Os03g12500</i> | AAGCTGCTGCAATACGTGTACTGG | CGACGAGCAACAGCCTTCCG    |
| <i>LOC_Os03g17700</i> | TTACCTAGAGAGATTGCACGAC   | TGGTGATTCAATCTAGTACCGG  |
| <i>LOC_Os07g23410</i> | TACTTCTCGTGGAAATACACCC   | TTGTACTTGTACACGTATGGGG  |
| <i>LOC_Os09g26600</i> | GAGAGGAGCTCTACGACTTCT    | CTGTACTTCCTCCCTCGTTATC  |
| <i>LOC_Os01g40870</i> | GTGACCAAGAACCTCAACATTG   | TGGTACATGGTACACTCTAGCT  |
| <i>LOC_Os02g39850</i> | AGCCCACCAAGCTGTACT       | GAAGATCACGTTGCCGAAGTAG  |
| <i>LOC_Os01g61080</i> | GCCGACGACCAGCAGATCACC    | ACGAGCCGACGCCGCCCTC     |
| <i>LOC_Os04g31030</i> | CTACAGGATTGGAAGTCGCTAA   | GCATTCTCAAACCTTCTGTGTGT |
| <i>LOC_Os04g09920</i> | CTCAAGTTCAGCAATGGGTTC    | CCAGTATAATTGCCTTGACGTG  |
| <i>LOC_Os02g36140</i> | CGAAGAATACATGGAAAGTGGC   | GCCTGAACAACATCATCGTATTC |
